# Supplementary material
Source: PubMed Central journal article supplement (PMC9357225)
Supplement: NIHMS1820013-supplement-1820013_Reporting_Summary.pdf [file NIHMS1820013-supplement-1820013_Reporting_Summary.pdf]

## Reporting Summary

Nature Portfolio wishes to improve the reproducibility of the work that we publish. This form provides structure for consistency and transparency in reporting. For further information on Nature Portfolio policies, see our [Editorial Policies](#) and the [Editorial Policy Checklist](#).

### Statistics

For all statistical analyses, confirm that the following items are present in the figure legend, table legend, main text, or Methods section.

n/a Confirmed

- The exact sample size ( $n$ ) for each experimental group/condition, given as a discrete number and unit of measurement
- A statement on whether measurements were taken from distinct samples or whether the same sample was measured repeatedly
- The statistical test(s) used AND whether they are one- or two-sided  
*Only common tests should be described solely by name; describe more complex techniques in the Methods section.*
- A description of all covariates tested
- A description of any assumptions or corrections, such as tests of normality and adjustment for multiple comparisons
- A full description of the statistical parameters including central tendency (e.g. means) or other basic estimates (e.g. regression coefficient) AND variation (e.g. standard deviation) or associated estimates of uncertainty (e.g. confidence intervals)
- For null hypothesis testing, the test statistic (e.g.  $F$ ,  $t$ ,  $r$ ) with confidence intervals, effect sizes, degrees of freedom and  $P$  value noted  
*Give  $P$  values as exact values whenever suitable.*
- For Bayesian analysis, information on the choice of priors and Markov chain Monte Carlo settings
- For hierarchical and complex designs, identification of the appropriate level for tests and full reporting of outcomes
- Estimates of effect sizes (e.g. Cohen's  $d$ , Pearson's  $r$ ), indicating how they were calculated

*Our web collection on [statistics for biologists](#) contains articles on many of the points above.*

### Software and code

Policy information about [availability of computer code](#)

**Data collection** Fluorescent and Histological images were acquired with Leica SP8 microscope with LAS X software (v3.5.7.23225). Illumina HiSeq 2500 was used to generate RNA-seq, MBD-seq and ChIP-seq data.

**Data analysis** All statistical analyses were performed using the GraphPad Prism software 9.0 (GraphPad Software, Inc. USA). RNA-seq data was analyzed using edgeR package (v3.36.0). ChIP-seq was analyzed using the encode chipseq pipeline (<https://github.com/ENCODE-DCC/chip-seq-pipeline2>). DiffBind (v3.0.15) was used to identify differential methylation region. ChIPSeqSpike (v1.9.0) was used to normalize spike in control. Image J (v1.0) software from NIH was used for image analysis. TCGA data analysis was performed with GEPIA2 webtool (<http://gepia2.cancer-pku.cn>). Genomic distribution was analyzed with ChIPseeker (v1.26.2). Motif analysis was carried out with RSAT webtool (<http://rsat.sb-roscoff.fr>). Chip-seq peak overlap analysis was done with Deeptools (v 3.5.0).

For manuscripts utilizing custom algorithms or software that are central to the research but not yet described in published literature, software must be made available to editors and reviewers. We strongly encourage code deposition in a community repository (e.g. GitHub). See the Nature Portfolio [guidelines for submitting code & software](#) for further information.

### Data

Policy information about [availability of data](#)

All manuscripts must include a [data availability statement](#). This statement should provide the following information, where applicable:

- Accession codes, unique identifiers, or web links for publicly available datasets
- A description of any restrictions on data availability
- For clinical datasets or third party data, please ensure that the statement adheres to our [policy](#)

RNA-seq, MBD-seq and ChIP-seq data that support the findings of this study have been deposited in the Gene Expression Omnibus (GEO) under accession numbers

## Field-specific reporting

Please select the one below that is the best fit for your research. If you are not sure, read the appropriate sections before making your selection.

Life sciences       Behavioural & social sciences       Ecological, evolutionary & environmental sciences

For a reference copy of the document with all sections, see [nature.com/documents/nr-reporting-summary-flat.pdf](https://www.nature.com/documents/nr-reporting-summary-flat.pdf)

## Life sciences study design

All studies must disclose on these points even when the disclosure is negative.

Sample size

Data exclusions

Replication

Randomization

Blinding

## Reporting for specific materials, systems and methods

We require information from authors about some types of materials, experimental systems and methods used in many studies. Here, indicate whether each material, system or method listed is relevant to your study. If you are not sure if a list item applies to your research, read the appropriate section before selecting a response.

### Materials & experimental systems

### Methods

- | n/a                                 | Involvement in the study                                        |
|-------------------------------------|-----------------------------------------------------------------|
| <input type="checkbox"/>            | <input checked="" type="checkbox"/> Antibodies                  |
| <input type="checkbox"/>            | <input checked="" type="checkbox"/> Eukaryotic cell lines       |
| <input checked="" type="checkbox"/> | <input type="checkbox"/> Palaeontology and archaeology          |
| <input type="checkbox"/>            | <input checked="" type="checkbox"/> Animals and other organisms |
| <input checked="" type="checkbox"/> | <input type="checkbox"/> Human research participants            |
| <input checked="" type="checkbox"/> | <input type="checkbox"/> Clinical data                          |
| <input checked="" type="checkbox"/> | <input type="checkbox"/> Dual use research of concern           |

- | n/a                                 | Involvement in the study                        |
|-------------------------------------|-------------------------------------------------|
| <input type="checkbox"/>            | <input checked="" type="checkbox"/> ChIP-seq    |
| <input checked="" type="checkbox"/> | <input type="checkbox"/> Flow cytometry         |
| <input checked="" type="checkbox"/> | <input type="checkbox"/> MRI-based neuroimaging |

## Antibodies

### Antibodies used

For western blot, anti-TET1 (1:1000, GeneTex, GTX124207), anti-TEAD1 (1:500, BD Transduction Laboratories, 610923), anti-TEAD4 (1:1000, abcam, ab58310), anti-GAPDH (clone 6C5) (1:3000, Millipore Sigma, MAB374), HRP-linked ECL anti-mouse IgG (1:5000, GE Healthcare, NA931) and HRP-linked ECL anti-rabbit IgG (1:5000, GE Healthcare, NA9340). For ChIP, anti-TEAD4 (4 µg, abcam, ab58310), anti-RNA polymerase II (2 µg, Millipore Sigma, 05-623), anti-trimethyl-Histone H3 (Lys4) (2 µl, Millipore Sigma, CS200580), anti-acetyl-Histone H3 (Lys 27) (2 µl, Millipore Sigma, 07-360) and anti-normal rabbit IgG (2 µl, Millipore Sigma, CS200581). For DNA dot blot, anti-5mC (1:500, Epigentek, A-1014), anti-5hmC (1:2000, Epigentek, A-1018). For immunostaining, anti-Ki-67 (1:500, DAKO GA62661-2), anti-wide spectrum screening cytokeratin (pan-CK) (1:500, DAKO, Z0622), anti-AFP (alpha fetal protein, 1:20, R & D Systems, MAB1368), anti-CK19 (cytokeratin 19, 1:500, AbboMax, 602-670), anti-PH3 (phosphorylated histone H3, 1:500, Millipore Sigma, MABE939), anti-ALB (albumin, 1:1000, Millipore Sigma, SAB3500217), anti-HNF4A (hepatocyte nuclear factor 4 alpha, 1:500, ThermoFisher, MA1-199), and anti-cleaved caspase-3 (1:500, Cell Signaling, 9661). For immunofluorescent staining, Alexa488-conjugated goat anti-mouse secondary antibodies (ThermoFisher, A-11001), Alexa488-conjugated goat anti-chicken secondary antibodies (ThermoFisher, A-11039), Alexa546-conjugated goat anti-rabbit secondary antibodies (ThermoFisher, A-11010), Alexa546-conjugated goat anti-rat secondary antibodies (ThermoFisher, A-11081) and Alexa647-conjugated goat anti-rat secondary antibodies (ThermoFisher, A-21247).

### Validation

The validation of commercially available antibodies was available on the manufacturer's website.

TET1: <https://www.genetex.com/Product/Detail/TET1-antibody-N3C1/GTX124207>

TEAD1: <https://www.bdbiosciences.com/en-us/products/reagents/microscopy-imaging-reagents/immunofluorescence-reagents/purified-mouse-anti-tef-1.610923>

TEAD4: <https://www.abcam.com/tead4-antibody-5h3-ab58310.html>

GAPDH: [https://www.emdmillipore.com/US/en/product/Anti-Glyceraldehyde-3-Phosphate-Dehydrogenase-Antibody-clone-6C5,MM\\_NF-MAB374](https://www.emdmillipore.com/US/en/product/Anti-Glyceraldehyde-3-Phosphate-Dehydrogenase-Antibody-clone-6C5,MM_NF-MAB374)  
 RNA PolII: [https://www.emdmillipore.com/US/en/product/Anti-RNA-polymerase-II-Antibody-clone-CTD4H8,MM\\_NF-05-623](https://www.emdmillipore.com/US/en/product/Anti-RNA-polymerase-II-Antibody-clone-CTD4H8,MM_NF-05-623)  
 H3K4me3: [https://www.emdmillipore.com/US/en/product/ChIPAb-Trimethyl-Histone-H3-Lys4-ChIP-Validated-Antibody-and-Primer-Set-rabbit-monoclonal,MM\\_NF-17-614?ReferrerURL=https%3A%2F%2Fwww.google.com%2F](https://www.emdmillipore.com/US/en/product/ChIPAb-Trimethyl-Histone-H3-Lys4-ChIP-Validated-Antibody-and-Primer-Set-rabbit-monoclonal,MM_NF-17-614?ReferrerURL=https%3A%2F%2Fwww.google.com%2F)  
 H3K27Ac: [https://www.emdmillipore.com/US/en/product/Anti-acetyl-Histone-H3-Lys27-Antibody,MM\\_NF-07-360](https://www.emdmillipore.com/US/en/product/Anti-acetyl-Histone-H3-Lys27-Antibody,MM_NF-07-360)  
 5mC: <https://www.epigentek.com/catalog/methylcytosine-mc-monoclonal-antibody-33d3-p-186.html>  
 5hmC: <https://www.epigentek.com/catalog/hydroxymethylcytosine-hmc-monoclonal-antibody-hmc4d9-p-3660.html>  
 Ki67 [https://www.agilent.com/en/product/immunohistochemistry/antibodies-controls/primary-antibodies/ki-67-antigen-\(dako-omnis\)-76239#:~:text=Ki%2D67%20Antigen%20\(Dako%20Omnis\),-Clone%20MIB%2D1&text=The%20Ki%2D67%20antigen%20is,of%20a%20variety%20of%20tumors.](https://www.agilent.com/en/product/immunohistochemistry/antibodies-controls/primary-antibodies/ki-67-antigen-(dako-omnis)-76239#:~:text=Ki%2D67%20Antigen%20(Dako%20Omnis),-Clone%20MIB%2D1&text=The%20Ki%2D67%20antigen%20is,of%20a%20variety%20of%20tumors.)  
 AFP: [https://www.rndsystems.com/products/human-mouse-alpha-fetoprotein-afp-antibody-189502\\_mab1368](https://www.rndsystems.com/products/human-mouse-alpha-fetoprotein-afp-antibody-189502_mab1368)  
 CK-19 <https://www.thermofisher.com/antibody/product/Cytokeratin-19-CK-19-Antibody-Polyclonal/602-670>  
 PH3: [https://www.rndsystems.com/products/human-mouse-alpha-fetoprotein-afp-antibody-189502\\_mab1368](https://www.rndsystems.com/products/human-mouse-alpha-fetoprotein-afp-antibody-189502_mab1368)  
 ALB <https://www.sigmaaldrich.com/US/en/product/sigma/sab3500217>  
 HNF4A <https://www.thermofisher.com/antibody/product/HNF4A-Antibody-clone-K9218-Monoclonal/MA1-199>  
 Cleaved Caspase-3: <https://www.cellsignal.com/products/primary-antibodies/cleaved-caspase-3-asp175-antibody/9661>

## Eukaryotic cell lines

Policy information about [cell lines](#)

|                                                                   |                                                                                                                                                                                  |
|-------------------------------------------------------------------|----------------------------------------------------------------------------------------------------------------------------------------------------------------------------------|
| Cell line source(s)                                               | 293T (Cat#CRL-3216,ATCC)                                                                                                                                                         |
| Authentication                                                    | Authentication was not performed for this study. Cell line was brought directly from ATCC. Morphological shape of cell line was monitored during the whole experimental process. |
| Mycoplasma contamination                                          | All cell lines were tested negative for mycoplasma contamination.                                                                                                                |
| Commonly misidentified lines (See <a href="#">ICLAC</a> register) | No commonly misidentified cell lines were used.                                                                                                                                  |

## Animals and other organisms

Policy information about [studies involving animals](#); [ARRIVE guidelines](#) recommended for reporting animal research

|                         |                                                                                                                                                                                                                                                                                                                                                                                                                                                                                                                                                                                                                                                                                                                                                                                                                                                                                                                                                                                                                                           |
|-------------------------|-------------------------------------------------------------------------------------------------------------------------------------------------------------------------------------------------------------------------------------------------------------------------------------------------------------------------------------------------------------------------------------------------------------------------------------------------------------------------------------------------------------------------------------------------------------------------------------------------------------------------------------------------------------------------------------------------------------------------------------------------------------------------------------------------------------------------------------------------------------------------------------------------------------------------------------------------------------------------------------------------------------------------------------------|
| Laboratory animals      | All experiments were performed in both male and female mice unless otherwise stated. Albumin-cre (Alb-cre)(003574) and Tet1 knockout (Tet1-/-)(017358) mice were obtained from the Jackson Laboratory. To generate liver-specific gene overexpression mice, ApoE-rtTA mice were bred with TRE-TAZ4SA mice. To generate liver-specific gene deletion mice, Alb-cre mice were bred with Mst1-/-; Mst2flox/flox, Nf2flox/flox, Sav1flox/flox or YAPflox/flox mice. To generate Tet1-deficient mice, Tet1-/- mice were bred with ApoE-rtTA-Yap, Alb-cre; Nf2flox/flox or Alb-cre; Sav1flox/flox mice. Both males and females were used for genetic experiments, and treatments started at about 1 month old.<br>All mice in this study were housed at the Animal Resource Center at the UT Southwestern Medical Center and bred inside an facility with 12h dark/12h light cycles and a climate control system monitoring the ambient temperature and humidity. Mice were provided standard laboratory chow and allowed free access to water. |
| Wild animals            | The study did not involve wild animal.                                                                                                                                                                                                                                                                                                                                                                                                                                                                                                                                                                                                                                                                                                                                                                                                                                                                                                                                                                                                    |
| Field-collected samples | The study did not involve field-collected samples.                                                                                                                                                                                                                                                                                                                                                                                                                                                                                                                                                                                                                                                                                                                                                                                                                                                                                                                                                                                        |
| Ethics oversight        | All animal experiments were performed with protocols approved by the Institutional Animal Care and Use Committee of the University of Texas Southwestern Medical Center.                                                                                                                                                                                                                                                                                                                                                                                                                                                                                                                                                                                                                                                                                                                                                                                                                                                                  |

Note that full information on the approval of the study protocol must also be provided in the manuscript.

## ChIP-seq

### Data deposition

- Confirm that both raw and final processed data have been deposited in a public database such as [GEO](#).
- Confirm that you have deposited or provided access to graph files (e.g. BED files) for the called peaks.

|                                                                    |                                                                                                                                                                                         |
|--------------------------------------------------------------------|-----------------------------------------------------------------------------------------------------------------------------------------------------------------------------------------|
| Data access links<br><i>May remain private before publication.</i> | <a href="https://www.ncbi.nlm.nih.gov/geo/query/acc.cgi?acc=GSE178227">https://www.ncbi.nlm.nih.gov/geo/query/acc.cgi?acc=GSE178227</a><br>Reviewer token: yzkbwcoshtwdj                |
| Files in database submission                                       | WT1_R1_001.fastq.gz<br>WT2_R1_001.fastq.gz<br>WT3_R1_001.fastq.gz<br>YAP1_R1_001.fastq.gz<br>YAP2_R1_001.fastq.gz<br>YAP3_R1_001.fastq.gz<br>AH1_R1_001.fastq.gz<br>AH2_R1_001.fastq.gz |

AH3\_R1\_001.fastq.gz  
 DAC1\_S6\_R1\_001.fastq.gz  
 DAC2\_S7\_R1\_001.fastq.gz  
 DAC3\_S8\_R1\_001.fastq.gz  
 WT\_methylation1\_S1\_R1\_001.fastq.gz  
 WT\_methylation2\_S2\_R1\_001.fastq.gz  
 YAP\_methylation1\_S3\_R1\_001.fastq.gz  
 YAP\_methylation2\_S4\_R1\_001.fastq.gz  
 AH\_methylation1\_S7\_R1\_001.fastq.gz  
 AH\_methylation2\_S8\_R1\_001.fastq.gz  
 DAC\_methylation1\_S5\_R1\_001.fastq.gz  
 DAC\_methylation2\_S6\_R1\_001.fastq.gz  
 WT\_input1\_S1\_R1\_001.fastq.gz  
 WT\_input2\_S2\_R1\_001.fastq.gz  
 YAP\_input1\_S3\_R1\_001.fastq.gz  
 YAP\_input2\_S4\_R1\_001.fastq.gz  
 AH\_input1\_S7\_R1\_001.fastq.gz  
 AH\_input2\_S8\_R1\_001.fastq.gz  
 TEAD\_1\_MERGED\_R1\_001.fastq.gz  
 TEAD\_2\_MERGED\_R1\_001.fastq.gz  
 TEAD\_3\_MERGED\_R1\_001.fastq.gz  
 TEAD\_4\_MERGED\_R1\_001.fastq.gz  
 TEAD\_5\_MERGED\_R1\_001.fastq.gz  
 TEAD\_6\_MERGED\_R1\_001.fastq.gz  
 TET\_1\_MERGED\_R1\_001.fastq.gz  
 TET\_2\_MERGED\_R1\_001.fastq.gz  
 TET\_3\_MERGED\_R1\_001.fastq.gz  
 TET\_4\_MERGED\_R1\_001.fastq.gz  
 WT1 raw.bigWig  
 WT2 raw.bigWig  
 YAP1 raw.bigWig  
 YAP2 raw.bigWig  
 AH1 raw.bigWig  
 AH2 raw.bigWig  
 DAC1 raw.bigWig  
 DAC2 raw.bigWig  
 TEAD4\_WT1.bigwig  
 TEAD4\_WT2.bigwig  
 TEAD4\_YAP1.bigwig  
 TEAD4\_YAP2.bigwig  
 TEAD4\_AH1.bigwig  
 TEAD4\_AH2.bigwig  
 TET1\_WT1.bigwig  
 TET1\_WT2.bigwig  
 TET1\_YAP1.bigwig  
 TET1\_YAP2.bigwig

Genome browser session  
 (e.g. [UCSC](#))

No public available genome browser section

## Methodology

|                         |                                                                                                                                                                                                                                                                                                                                                                                                                                                                                                                                                                                                                                                                                                                                                                                                                                                                                                                                                                                                  |
|-------------------------|--------------------------------------------------------------------------------------------------------------------------------------------------------------------------------------------------------------------------------------------------------------------------------------------------------------------------------------------------------------------------------------------------------------------------------------------------------------------------------------------------------------------------------------------------------------------------------------------------------------------------------------------------------------------------------------------------------------------------------------------------------------------------------------------------------------------------------------------------------------------------------------------------------------------------------------------------------------------------------------------------|
| Replicates              | Two replicates for each antibody per group                                                                                                                                                                                                                                                                                                                                                                                                                                                                                                                                                                                                                                                                                                                                                                                                                                                                                                                                                       |
| Sequencing depth        | 35-45M raw sequencing reads for each sample, 75bp length of read, single-end.                                                                                                                                                                                                                                                                                                                                                                                                                                                                                                                                                                                                                                                                                                                                                                                                                                                                                                                    |
| Antibodies              | TET1 antibody GeneTex Cat#: GTX124207<br>TEAD4 antibody Abcam Cat#: ab58310                                                                                                                                                                                                                                                                                                                                                                                                                                                                                                                                                                                                                                                                                                                                                                                                                                                                                                                      |
| Peak calling parameters | TET1 and TEAD4 peaks were called against mm10 background using MACS2 default parameters.                                                                                                                                                                                                                                                                                                                                                                                                                                                                                                                                                                                                                                                                                                                                                                                                                                                                                                         |
| Data quality            | Raw sequence data was quality checked with FastQC v.0.11.5. Mapped data in BAM and bigWig format was quality assessed with SAMTools v.1.3.1, PICARD v.2.6.0, deepTools v.2.4.3 and by visual inspection on the UCSC genome browser.                                                                                                                                                                                                                                                                                                                                                                                                                                                                                                                                                                                                                                                                                                                                                              |
| Software                | Reads were aligned with Bowtie2 to the mm10 mouse genome and duplicates were removed from the mapped data using PICARD. Peaks were called against input samples of each condition using MACS2 default parameters. Aligned results were normalized with ChipSeqSpike R package and visualized by uploading normalized Bigwig files into mm10 assembly of UCSC genome browser. TET1 and TEAD4 peaks were called against mm10 background using MACS2 default parameters. Correlation between TEAD4 and TET1 ChIP-seq signal was visualized by plotting the average of normalized read count data at each overlapped peak with ggplot2 R package. TEAD4 ChIP-seq signals summit to TET1 peaks, TET1 ChIP-seq signals summit to TEAD4 peaks and TET1/TEAD4/H3K27ac ChIP-seq signals summit to TET1/TEAD4 overlapped peaks were performed with DeepTools 3.5.0 and visualized with plotHeatmap function in DeepTools. Distribution of TEAD motif at TET1 peaks was performed with TFMotifView website. |
