# Supplementary material
Source: PubMed Central journal article supplement (PMC9357225)
Supplement: NIHMS1820013-supplement-1820013_Sup_Info_File.pdf [file NIHMS1820013-supplement-1820013_Sup_Info_File.pdf]

## **Supplementary information**

### **YAP induces an oncogenic transcriptional program through TET1-mediated epigenetic remodeling in liver growth and tumorigenesis**

Bo-Kuan Wu, Szu-Chieh Mei, Elizabeth H. Chen, Yonggang Zheng, and Duojia Pan

Correspondence to: [duojia.pan@utsouthwestern.edu](mailto:duojia.pan@utsouthwestern.edu) (D.P.)

**Supplementary Table 1. GO biological process analysis of up- or down-regulated genes by YAP activation**

| <b>YAP Tg / CTL</b> | <b>Biological Process Term</b>                 | <b>nGenes</b> | <b>adjusted <i>P</i></b> |
|---------------------|------------------------------------------------|---------------|--------------------------|
| Up regulated        | Response to stress                             | 113           | 4.91E-16                 |
|                     | Regulation of localization                     | 94            | 1.48E-14                 |
|                     | Response to stimulus                           | 86            | 1.70E-14                 |
|                     | Regulation of multicellular organismal process | 90            | 1.84E-14                 |
|                     | Regulation of developmental process            | 91            | 1.92E-14                 |
|                     | Positive regulation of developmental process   | 64            | 4.01E-14                 |
|                     | Embryogenesis and morphogenesis                | 87            | 1.46E-13                 |
|                     | Cell motility                                  | 64            | 1.46E-13                 |
|                     | Regulation of cellular component organization  | 65            | 1.76E-13                 |
|                     | System development                             | 125           | 2.05E-13                 |
| Down regulated      | Small molecule metabolic process               | 256           | 1.05E-114                |
|                     | Organic acid metabolic process                 | 192           | 2.75E-108                |
|                     | Carboxylic acid metabolic process              | 184           | 4.86E-106                |
|                     | Oxoacid metabolic process                      | 186           | 1.00E-104                |
|                     | Oxidation-reduction process                    | 172           | 2.80E-80                 |
|                     | Monocarboxylic acid metabolic process          | 127           | 3.36E-76                 |
|                     | Lipid metabolic process                        | 168           | 1.01E-66                 |
|                     | Fatty acid metabolic process                   | 88            | 1.36E-53                 |
|                     | Small molecule catabolic process               | 80            | 3.78E-49                 |
|                     | Drug metabolic process                         | 106           | 3.80E-44                 |

Note: Over-Representation Analysis was used for statistical analysis and Bonferroni adjusted *P* values are shown.

**Supplementary Table 2. GO biological process analysis of genes associated with YAP-induced decrease or increase in DNA methylation**

| YAPTg / CTL                           | Biological Process Term                 | FDR Q-Val | Fold Enrichment |
|---------------------------------------|-----------------------------------------|-----------|-----------------|
| Methylation decrease                  | Developmental process                   | 0         | 2.692012        |
|                                       | Cell growth                             | 0         | 2.58933         |
|                                       | Regulation of localization #            | 0         | 2.746334        |
|                                       | Anatomical structure development        | 0         | 2.691805        |
|                                       | System development #                    | 0         | 2.720312        |
|                                       | Cell differentiation                    | 0         | 2.708641        |
|                                       | Embryogenesis and morphogenesis #       | 0         | 2.760538        |
|                                       | Regulation of developmental process #   | 0         | 2.732658        |
|                                       | Response to stimulus #                  | 0         | 2.721302        |
| Regulation of signaling               | 0                                       | 2.702711  |                 |
| Methylation increase                  | Small molecule metabolic process *      | 3.94E-157 | 2.049202        |
|                                       | Cellular catabolic process              | 2.46E-112 | 2.038769        |
|                                       | Organic acid metabolic process *        | 2.11E-98  | 2.134464        |
|                                       | Oxoacid metabolic process *             | 1.64E-96  | 2.135172        |
|                                       | Carboxylic acid metabolic process *     | 2.93E-95  | 2.192601        |
|                                       | Cellular lipid metabolic process        | 1.45E-76  | 2.013214        |
|                                       | Small molecule biosynthetic process     | 1.61E-57  | 2.372434        |
|                                       | Monocarboxylic acid metabolic process * | 2.53E-55  | 2.151077        |
|                                       | Fatty acid metabolic process *          | 1.47E-45  | 2.288306        |
| Cellular amino acid metabolic process | 4.25E-41                                | 2.36484   |                 |

# indicates that the same biological process term is enriched in up-regulated genes in YAPTg livers (compare with Supplementary Table 1)

\* indicates that the same biological process term is enriched in down-regulated genes in YAPTg livers (compare with Supplementary Table 1)

**Supplementary Table 3. Overlap of YAP-induced rDMRs and ChIP-seq profile of histone markers from mouse fetal liver**

| <b>Histone modification (ChIP-seq)</b> | <b># YAP-induced rDMRs</b> | <b># overlap between rDMRs and ChIP-seq peaks</b> | <b>% overlap between rDMRs and ChIP-seq peaks</b> | <b>adjusted <i>P</i></b> |
|----------------------------------------|----------------------------|---------------------------------------------------|---------------------------------------------------|--------------------------|
| H3K4me1                                | 14282                      | 2320                                              | 16.24%                                            | < 0.001                  |
| H3K4me3                                | 14282                      | 331                                               | 2.32%                                             | < 0.001                  |

Note: H3K4me1 is an enhancer marker, H3K4me3 is a promoter marker. Over-Representation Analysis was used for statistical analysis and Bonferroni adjusted *P* values are shown.

**Supplementary Table 4. Motifs and matched transcription factors (TFs) in YAP-induced rDMRs**

| Motifs (6-mer) | E-value  | Matched TFs          | Motifs (7-mer) | E-value  | Matched TFs                 |
|----------------|----------|----------------------|----------------|----------|-----------------------------|
|                | 4.80E-32 | STAT2, ZNF384, MECOM |                | 8.50E-30 | FOXA1, MEF2A, MEF2C         |
|                | 1.10E-26 | SOX10, SOX15, SOX3   |                | 1.00E-26 | KLF1, KLF2, KLF6            |
|                | 2.50E-20 | RUNX1, RUNX3, RUNX2  |                | 1.30E-18 | STAT2, SOX15, SOX3          |
|                | 4.70E-14 | ZBTB7A, GABPA, SPI1  |                | 1.40E-18 | ZNF384, SOX15, SOX5         |
|                | 6.90E-13 | SOX8, SOX14, NKX3-2  |                | 2.90E-14 | PRDM4, MEIS1, FOS::JUN      |
|                | 8.70E-13 | GATA1                |                | 3.30E-14 | PRDM4, FOXO1, FOXP1         |
|                | 3.60E-12 | IRF5, ZNF136, NFYB   |                | 3.50E-13 | PRDM4, SPI1, OSR2           |
|                | 7.10E-12 | DLX1, RAX, MIXL1     |                | 1.80E-12 | KLF9, MSANTD3, NKX2-5       |
|                | 1.10E-11 | TEAD4, TEAD1, TEAD2  |                | 4.60E-12 | STAT2, ZNF384, STAT1::STAT2 |
|                | 2.50E-11 | HOXB13, MEF2C, MEF2A |                | 7.10E-12 | PRDM4, PRDM1, SMAD4         |

**Supplementary Table 5. GO biological process analysis of genes associated with TET1-dependent rDMRs**

| <b>Biological Process Term</b>          | <b>FDR Q-Val</b> | <b>Fold Enrichment</b> |
|-----------------------------------------|------------------|------------------------|
| Developmental process *                 | 0                | 2.70819                |
| Multicellular organism development      | 0                | 2.724353               |
| Embryogenesis and morphogenesis * #     | 0                | 2.702879               |
| System development * #                  | 0                | 2.740318               |
| Regulation of localization * #          | 0                | 2.706329               |
| Cell differentiation *                  | 0                | 2.73403                |
| Cellular developmental process          | 0                | 2.71477                |
| Response to stimulus * #                | 0                | 2.717729               |
| Organogenesis                           | 0                | 2.75136                |
| Regulation of developmental process * # | 0                | 2.732671               |

\* indicates that the same biological process term is enriched in YAP rDMRs-associated genes (compare with Supplementary Table 2).

# indicates that the same biological process term is enriched in both up-regulated genes in YAPTg livers and YAP rDMRs-associated genes (compare with Supplementary Table 1 and 2).

**Supplementary Table 6. GO biological process analysis of up-regulated genes in YAPTg livers that were down-regulated by *Tet1*-deletion**

| <b>Biological Process Term</b>                   | <b>nGenes</b> | <b>adjusted <i>P</i></b> |
|--------------------------------------------------|---------------|--------------------------|
| Regulation of localization #                     | 127           | 6.15E-22                 |
| Regulation of developmental process #            | 118           | 9.38E-19                 |
| Response to stress #                             | 135           | 1.28E-16                 |
| Regulation of multicellular organismal process # | 123           | 2.12E-16                 |
| Embryogenesis and morphogenesis #                | 110           | 2.18E-16                 |
| Response to stimulus #                           | 141           | 2.18E-16                 |
| Positive regulation of developmental process #   | 78            | 5.79E-16                 |
| Cell motility #                                  | 79            | 7.68E-16                 |
| Cell adhesion                                    | 71            | 9.88E-16                 |
| System development #                             | 75            | 9.92E-16                 |

# indicates that the same biological process term is enriched in up-regulated genes in YAPTg livers (compare with Supplementary Table 1)

Note: Over-Representation Analysis was used for statistical analysis and Bonferroni adjusted *P* values are shown.

**Supplementary Table 7. List of 1,003 TET1-dependent YAP target genes**

|               |           |             |          |         |               |           |
|---------------|-----------|-------------|----------|---------|---------------|-----------|
| 1110051M20RIK | ADC       | ARHGAP25    | CACNA1S  | CHAF1B  | CYTH4         | ENOPH1    |
| 1500012F01RIK | ADCY2     | ARHGAP27    | CADM4    | CHEK1   | DAB1          | ENTPD1    |
| 1700011H14RIK | ADCY7     | ARHGDIB     | CAMP     | CHMP4C  | DAB2          | EPB4.1L3  |
| 1700016C15RIK | ADGB      | ARHGEF2     | CAPNS2   | CHP2    | DAB2IP        | EPB4.1L4A |
| 1700020N01RIK | ADORA1    | ARID5A      | CARD9    | CHST14  | DAPK2         | EPS8L2    |
| 1700030C10RIK | ADRB1     | ARL11       | CASC5    | CHST3   | DAPP1         | EPS8L3    |
| 1700040L02RIK | ADRB2     | ARL4C       | CASP2    | CIB3    | DCBLD1        | EPSTI1    |
| 1700061I17RIK | AEN       | ARPC1B      | CATSPER4 | CIT     | DCDC2A        | ERC2      |
| 1700084C01RIK | AGPAT4    | ASAH1       | CBLN3    | CKB     | DCLK3         | ESM1      |
| 1700113H08RIK | AGRN      | ASAP3       | CCDC14   | CLDN23  | DCP1B         | ESPN      |
| 1810011H11RIK | AHNAK     | ASB15       | CCDC148  | CLEC12A | DDAH2         | EVA1B     |
| 1810062G17RIK | AI413582  | ASF1B       | CCDC158  | CLEC2I  | DDR1          | EVL       |
| 2010109I03RIK | AI429214  | ASPRV1      | CCDC64   | CLEC4A1 | DEFB1         | EVPL      |
| 2310007B03RIK | AI467606  | ASXL3       | CCDC68   | CLEC4B1 | DGKI          | EXO1      |
| 2510009E07RIK | AIF1      | ATF3        | CCDC88B  | CLEC4F  | DIAP3         | EZR       |
| 2900011O08RIK | AIM2      | ATOH8       | CCL2     | CLIC1   | DISC1         | F2RL1     |
| 4930426L09RIK | AKAP2     | ATP13A4     | CCL24    | CLIP2   | DLC1          | F2RL3     |
| 4930427A07RIK | AKR1B10   | ATP1B3      | CCL5     | CMKLR1  | DLG4          | F3        |
| 4930429B21RIK | AKR1B3    | ATP8B2      | CCL7     | CNBD2   | DLGAP5        | FA2H      |
| 4930550C14RIK | AKR1B7    | AXL         | CCL9     | COL16A1 | DNAAF3        | FADS3     |
| 4933427E11RIK | ALDH18A1  | B3GNT8      | CCND1    | COL23A1 | DNM3          | FAM105A   |
| 5031414D18RIK | ALOX5AP   | B4GALNT4    | CCND3    | CORO2A  | DOCK2         | FAM110A   |
| 5730508B09RIK | AMOTL2    | B4GALT6     | CCR1     | COTL1   | DOK1          | FAM110C   |
| 6330416G13RIK | AMPD3     | BAIAP2L2    | CCR5     | CPEB1   | DOK4          | FAM111A   |
| 8430427H17RIK | ANGPTL1   | BASP1       | CD2AP    | CPNE8   | DOS           | FAM118A   |
| A4GALT        | ANGPTL7   | BATF2       | CD300A   | CRLF2   | DUSP2         | FAM129A   |
| A530016L24RIK | ANK1      | BC021891    | CD300LB  | CRTAM   | DUSP5         | FAM132A   |
| A530032D15RIK | ANK3      | BC049352    | CD300LF  | CRYAB   | DUSP7         | FAM13C    |
| A530064D06RIK | ANKRD27   | BC100451    | CD37     | CRYGS   | DYRK4         | FAM163A   |
| A630001G21RIK | ANKRD6    | BCL2        | CD40     | CRYM    | E230008N13RIK | FAM212B   |
| A730020M07RIK | ANKS6     | BCL2A1D     | CD44     | CSF1    | E330021D16RIK | FAM49A    |
| A930004D18RIK | ANLN      | BEND6       | CD48     | CSF1R   | ECT2          | FAM49B    |
| ABCA13        | ANO6      | BICC1       | CD5L     | CSF2RB  | EDA           | FAM65B    |
| ABCA4         | ANXA2     | BIN2        | CD74     | CSF2RB2 | EDIL3         | FAM72A    |
| ABCA5         | ANXA3     | BIN3        | CD80     | CSNK1E  | EFCAB4B       | FAM73A    |
| ABCC1         | ANXA4     | BMP6        | CD83     | CSRNP3  | EGR2          | FAM78A    |
| ABCC12        | ANXA5     | BMPER       | CD97     | CSRP1   | EHD4          | FAM83B    |
| ABCC5         | AOAH      | BORA        | CDC42EP1 | CTGF    | EIF4E3        | FAM83D    |
| ABCG1         | AP1S2     | BRCA1       | CDCA7L   | CTNNAL1 | ELL3          | FAM84A    |
| ABCG3         | APBB1IP   | BTBD11      | CDCA8    | CTPS    | ELN           | FAM84B    |
| ABI2          | APH1B     | BTC         | CDK1     | CTSS    | ELOVL7        | FANCA     |
| ABI3          | APOBEC3   | BTG2        | CDKL1    | CX3CL1  | EMB           | FBLIM1    |
| ABR           | APOL10A   | BTLA        | CDKN1C   | CX3CR1  | EME1          | FBXO25    |
| ACE           | APP       | BUB1        | CDS1     | CXCL16  | EMILIN2       | FBXO48    |
| ACTA2         | ARC       | C1QA        | CDS2     | CXCL17  | EMP2          | FCGBP     |
| ADAM11        | ARF2      | C1QB        | CEACAM2  | CXCR4   | EMR1          | FCGR1     |
| ADAM12        | ARG2      | C1QL3       | CENPF    | CYFIP2  | EMR4          | FCGR3     |
| ADAM5         | ARHGAP11A | C330027C09F | CENPN    | CYP2A22 | ENAH          | FCGR4     |
| ADAMTS7       | ARHGAP15  | C3AR1       | CEP72    | CYP4F16 | ENC1          | FCNB      |
| ADAP1         | ARHGAP19  | C5AR1       | CERS6    | CYR61   | ENGASE        | FCRL1     |



|         |               |          |         |          |         |          |
|---------|---------------|----------|---------|----------|---------|----------|
| FERMT3  | GPR132        | IDO1     | KIF21B  | MANBAL   | MYL12B  | OSBPL3   |
| FGD3    | GPR137B       | IFI204   | KIF22   | MAP3K14  | MYO1C   | OSBPL7   |
| FGR     | GPR141        | IFI205   | KIFC1   | MAPK13   | MYO5C   | OSCP1    |
| FHL2    | GPR160        | IFIT1    | KIFC3   | MARCO    | MYO9A   | OTUD1    |
| FIBIN   | GPR176        | IFNGR1   | KL      | MATN4    | MYOT    | OXCT1    |
| FLI1    | GPR18         | IFNLR1   | KLF11   | MB21D1   | NAIP1   | P2RX5    |
| FLT3    | GPR183        | IGF2     | KLF5    | MBD4     | NAIP5   | P2RX7    |
| FMNL1   | GPR35         | IGF2BP1  | KLHDC1  | MBIP     | NAP1L1  | P2RY12   |
| FMO2    | GPR39         | IKZF1    | KLHDC7A | MBLAC1   | NCAPD2  | P2RY13   |
| FOS     | GPR56         | IL10RA   | KLHL13  | MBP      | NCAPH   | P4HA2    |
| FRMD4A  | GPR84         | IL12A    | KLHL31  | MCF2     | NCF4    | PAK1     |
| FRY     | GPX3          | IL16     | KLRA6   | MCF2L    | NCKAP5L | PALMD    |
| FSTL3   | GPX7          | IL17RD   | KLRG2   | MCM4     | NCOA7   | PANX1    |
| FUT10   | GRAMD1B       | IL1B     | KRT4    | MCM6     | NEBL    | PAQR6    |
| FXYD5   | GREB1L        | IL1R2    | KRT80   | MECOM    | NEDD9   | PARD3B   |
| FYB     | GSG1          | IL22RA1  | KRTCAP3 | MERTK    | NEIL2   | PARD6B   |
| GADD45A | GSG2          | IL33     | LAIR1   | METRNL   | NEK5    | PARM1    |
| GAL3ST1 | GSTA1         | INADL    | LAMA5   | MEX3B    | NENF    | PARVG    |
| GALK1   | GYLTL1B       | INCENP   | LAMC2   | MFSD10   | NEU3    | PATZ1    |
| GALNT3  | GYPE          | INPP5D   | LAPTM5  | MFSD7B   | NEURL1A | PAWR     |
| GAS6    | GZMK          | IRF4     | LGALS3  | MFSD7C   | NEURL1B | PCOLCE2  |
| GATM    | H2-DMB1       | IRF8     | LGR6    | MGAT4A   | NEURL3  | PDE6C    |
| GBGT1   | H2-EB1        | ISM2     | LIF     | MGST2    | NFAM1   | PDGFB    |
| GCNT1   | H2-OB         | ITGA11   | LIG1    | MICAL1   | NFE2L2  | PDLIM2   |
| GDPD5   | HAO2          | ITGA3    | LILRA5  | MIS18A   | NFKB2   | PDLIM4   |
| GGT1    | HAVCR2        | ITGA4    | LIMCH1  | MKI67    | NGP     | PDZK1IP1 |
| GIPC2   | HBEGF         | ITGA6    | LIMD2   | MLLT3    | NID2    | PEG3     |
| GJA5    | HCK           | ITGAM    | LIMS1   | MNS1     | NKX2-6  | PF4      |
| GKAP1   | HDAC11        | ITGAX    | LIPO1   | MORC4    | NLRC4   | PGAP3    |
| GLIPR2  | HES1          | ITPR3    | LMCD1   | MPDZ     | NLRP3   | PHACTR3  |
| GLIS2   | HEY1          | ITPRIPL2 | LPCAT2  | MPHOSPH6 | NOD2    | PHIP     |
| GLIS3   | HK2           | JDP2     | LPCAT4  | MPO      | NOS1    | PHLDA2   |
| GLRP1   | HK3           | KCNA2    | LPHN3   | MPP7     | NOS1AP  | PHLDA3   |
| GM13251 | HMGB2         | KCNAB2   | LRMP    | MRO      | NOS2    | PHLDB1   |
| GM13547 | HN1           | KCNE3    | LRRC1   | MSRB3    | NOXA1   | PI16     |
| GM16432 | HNF1B         | KCNG2    | LRRC25  | MSTO1    | NR4A1   | PIK3CD   |
| GM5150  | HOMER3        | KCNJ16   | LRRC39  | MT1      | NRADD   | PIK3R5   |
| GM5420  | HPCAL1        | KCNJ2    | LST1    | MTAP7D3  | NRAP    | PIK3R6   |
| GM6484  | HPGDS         | KCNJ9    | LTC4S   | MTHFD2L  | NRIP2   | PILRA    |
| GM765   | HRH1          | KCNK13   | LTF     | MTUS2    | NRM     | PILRB1   |
| GMDS    | HSF2BP        | KCNMB1   | LXN     | MUM1L1   | NUAK1   | PKDCC    |
| GMFG    | HSPB2         | KCNN4    | LY6C2   | MVB12B   | NUAK2   | PKIA     |
| GMIP    | HTRA3         | KCNU1    | LY6D    | MVP      | NUMBL   | PKP2     |
| GNAI1   | HYDIN         | KCTD12B  | LYNX1   | MXD3     | OAS2    | PLA2G5   |
| GNG2    | I830077J02RIK | KIF11    | LYZ1    | MYB      | OIP5    | PLAC8    |
| GNGT2   | ICOSL         | KIF14    | M1AP    | MYBPC1   | OLFM3   | PLAT     |
| GNPDA2  | ID2           | KIF15    | MAD2L1  | MYBPC3   | OPTC    | PLAU     |
| GOLM1   | ID3           | KIF18B   | MADCAM1 | MYC      | ORAI2   | PLAUR    |
| GPNMB   | ID4           | KIF20A   | MAFK    | MYH15    | ORC1    | PLCG2    |
| GPR114  | IDH2          | KIF20B   | MAGI2   | MYL12A   | OSBPL10 | PLCL1    |

|           |          |           |          |          |         |        |
|-----------|----------|-----------|----------|----------|---------|--------|
| PLD1      | RAC2     | SEPN1     | SLFN1    | TBC1D1   | TRPS1   | ZFP90  |
| PLD2      | RAD51    | SEPT6     | SLFN2    | TBC1D19  | TRPV4   | ZFP956 |
| PLD6      | RANBP3L  | SEPT8     | SLFN3    | TBC1D9   | TSPAN15 | ZYX    |
| PLEK      | RAP1GAP  | SERPINB6B | SLFN8    | TBXAS1   | TSPAN17 |        |
| PLEK2     | RAP1GAP2 | SESTD1    | SLIT1    | TCEA2    | TTC22   |        |
| PLEKHA2   | RASA3    | SETD7     | SLPI     | TEAD1    | TTK     |        |
| PLEKHA4   | RASAL1   | SFRP5     | SMAD7    | TEAD4    | TTLL10  |        |
| PLEKHH1   | RASGRP1  | SGK1      | SMC1B    | TEKT5    | TTLL9   |        |
| PLEKHM3   | RASGRP3  | SH2D1B1   | SMCO3    | TFEC     | TTN     |        |
| PLEKHO1   | RASL11A  | SH2D4A    | SMIM6    | TGFA     | TUBA1B  |        |
| PLTP      | RBBP8    | SH3BP1    | SMO      | TGIF1    | TUBB6   |        |
| PMP22     | RBL1     | SH3D21    | SMOC2    | TGM2     | UBASH3B |        |
| POU2F2    | RCAN3    | SH3KBP1   | SMPD3    | THEMIS2  | UBTD2   |        |
| POU4F1    | RELB     | SH3TC1    | SMPD5    | TIFAB    | UCK2    |        |
| PPBP      | REM2     | SHANK2    | SMTNL2   | TIMD4    | UMODL1  |        |
| PPFIA4    | RFTN1    | SHC4      | SNX20    | TIMP2    | UNC5B   |        |
| PPL       | RGCC     | SHROOM3   | SOAT1    | TLX1     | UST     |        |
| PPM1H     | RGS1     | SIAH1A    | SOCS3    | TM6SF1   | VASP    |        |
| PPP1R36   | RGS10    | SIGLEC1   | SOD3     | TMC3     | VAV1    |        |
| PQLC3     | RGS11    | SIGLECE   | SORBS1   | TMCC3    | VEPH1   |        |
| PRC1      | RGS19    | SKA1      | SORBS2   | TMEM117  | VGLL3   |        |
| PRDM1     | RGS9BP   | SLA       | SOX4     | TMEM136  | VILL    |        |
| PRELP     | RHBDF2   | SLC11A1   | SOX9     | TMEM150E | VIM     |        |
| PREX1     | RHOH     | SLC13A5   | SPATA7   | TMEM191C | VLDLR   |        |
| PRKCB     | RILPL1   | SLC14A1   | SPDL1    | TMEM194E | VOPP1   |        |
| PRKCD     | RINL     | SLC15A3   | SPECC1   | TMEM246  | WBSCR17 |        |
| PRMT2     | RNASEL   | SLC16A5   | SPIC     | TMEM41A  | WDFY4   |        |
| PROCR     | RNF145   | SLC16A9   | SPIRE2   | TMEM43   | WDR52   |        |
| PROM1     | RNF180   | SLC1A5    | SPON2    | TMEM65   | WEE1    |        |
| PRR24     | RNF186   | SLC22A21  | SPP1     | TMEM98   | WFDC2   |        |
| PRR5L     | ROR1     | SLC22A4   | SRC      | TMPO     | WIPF1   |        |
| PRRG4     | RPH3AL   | SLC25A24  | SRGAP3   | TMSB4X   | WNT9A   |        |
| PRUNE2    | RPL39L   | SLC25A4   | SRGN     | TNFAIP2  | WWC1    |        |
| PSTPIP1   | RPS6KA4  | SLC26A2   | ST3GAL2  | TNFAIP3  | WWC2    |        |
| PTGDS     | RRAGB    | SLC26A8   | ST8SIA4  | TNFAIP6  | XCL1    |        |
| PTGS1     | RRAS2    | SLC27A6   | STAMBPL1 | TNFAIP8  | ZBTB3   |        |
| PTP4A3    | RTKN2    | SLC28A2   | STK17B   | TNFRSF11 | ZC3H7B  |        |
| PTPN13    | RUNX1    | SLC2A3    | STMN1    | TNFRSF13 | ZDHHC23 |        |
| PTPN14    | S1PR2    | SLC35F2   | STMND1   | TNFRSF19 | ZFP113  |        |
| PTPN18    | SAMD4    | SLC38A1   | STOML1   | TNFRSF25 | ZFP248  |        |
| PTPN6     | SAMSN1   | SLC39A13  | STRADA   | TNFRSF9  | ZFP382  |        |
| PTPN7     | SASH3    | SLC40A1   | STX3     | TPCN2    | ZFP449  |        |
| PTPRC     | SCEL     | SLC41A3   | SULT2B1  | TRAIP    | ZFP532  |        |
| PTPRH     | SCHIP1   | SLC44A3   | SYNC     | TREM1    | ZFP608  |        |
| PTPRM     | SCUBE3   | SLC4A3    | SYNGR1   | TREML2   | ZFP618  |        |
| R3HCC1    | SDK1     | SLC4A9    | SYNPO    | TREML4   | ZFP651  |        |
| RAB11FIP4 | SDPR     | SLC5A11   | SYT17    | TRIM30B  | ZFP688  |        |
| RAB31     | SELPLG   | SLC7A8    | TAB1     | TRIM35   | ZFP69   |        |
| RAB39     | SEMA3B   | SLC8A1    | TACC3    | TRIM36   | ZFP747  |        |
| RAB44     | SEMA4D   | SLCO1A5   | TAGAP    | TRIP6    | ZFP810  |        |

**Supplementary Table 8. GO biological process analysis of 1,003 TET1-dependent YAP target genes (genes with both TET1-dependent DNA demethylation and TET1-dependent mRNA induction upon YAP activation)**

| <b>Biological Process Term</b>      | <b>nGenes</b> | <b>adjusted <i>P</i></b> |
|-------------------------------------|---------------|--------------------------|
| Regulation of localization          | 69            | 1.68E-14                 |
| Regulation of developmental process | 63            | 6.76E-12                 |
| Cell motility                       | 45            | 3.31E-11                 |
| Cellular developmental process      | 81            | 3.50E-11                 |
| Regulation of transport             | 50            | 4.12E-11                 |
| Regulation of cell motility         | 34            | 5.77E-11                 |
| Embryogenesis and morphogenesis     | 58            | 1.61E-10                 |
| Cell migration                      | 41            | 1.61E-10                 |
| Response to stimulus                | 40            | 2.36E-10                 |
| System development                  | 38            | 2.41E-10                 |

Note: Over-Representation Analysis was used for statistical analysis and Bonferroni adjusted *P* values are shown.

**Supplementary Table 9. Primer sets**

| mRNA                                    | Primer forward                                                                                    | Primer reverse                                           |
|-----------------------------------------|---------------------------------------------------------------------------------------------------|----------------------------------------------------------|
| <i>Tef1</i>                             | AGAGAAATCGAGGTGCTC                                                                                | CCCCATGACCACCGTCTACTG                                    |
| <i>Gapdh</i>                            | GGTGTGAACGGATTTGGCCG                                                                              | GACAAGTTCCTCCATCTCGG                                     |
| <i>Myc</i>                              | CCTTTGGGGTTGGAACC                                                                                 | CGTCGCAGATGAAATAGGG                                      |
| <i>Cyr61</i>                            | CCGAACCGCGAGTCTTTTC                                                                               | TCGTGTGGAGATGCCAGTTC                                     |
| <i>Ctgf</i>                             | AGTGTGCACITGCCAAGATG                                                                              | CCAGGCAAGTGCATTTGGTAT                                    |
| <i>Yap</i>                              | TGCCGTCAATAAACCACAGAC                                                                             | GTCAGAGCTCCCGCAGTACG                                     |
| <i>Taz</i>                              | AGCAGTCCATGACGTGACC                                                                               | GTGGAAATGATGGACGGGTG                                     |
| <i>Tead1</i>                            | AGCAGAGAGACCAGACTCG                                                                               | TCCACAGATTCGAGCAACGG                                     |
| <i>Tead4</i>                            | GAGCCCGAAATTGACGAA                                                                                | CTGGAGACTGCTTCCITGT                                      |
| <i>Msi1</i>                             | TCCCTCAGGATGGAGACTATGA                                                                            | TGGGCTGGTGTTCAGAAAT                                      |
| <i>Msi2</i>                             | GCGGCTAAAGCACATAGACC                                                                              | CTGGTCATCCTGAGACAGAGG                                    |
| <i>Lats1</i>                            | TGCGAACAGGATATACACGC                                                                              | CAGCTTAGCTTGAGGAGGG                                      |
| <i>Lats2</i>                            | GTACACGAGCTCTGTGACT                                                                               | TAGGGATGACGCGTGCTC                                       |
| <i>Nf2</i>                              | GCCCAAGGCAGAAACCTATC                                                                              | CCATCCTGTGGTGTAGGAG                                      |
| <i>Sav1</i>                             | GATCAGCCTCCACCCATCAC                                                                              | TCAGCATTCCTGGTACGTG                                      |
| <i>Kibra</i>                            | AGAGGAGTGTCTGGAGGTG                                                                               | CCACGGCTGTCTGTCTAGC                                      |
| <i>Almot12</i>                          | ACTGTACCTAAGCCGAACCG                                                                              | CATGTTCTCTGGCTTGCAC                                      |
| <b>MBD/ hMeDIP/ ChIP/ FAIRE</b>         | <b>Primer-1</b>                                                                                   | <b>Primer-2</b>                                          |
| <i>Tef1</i>                             | CAGTTTAGGGTGGCTGGGG                                                                               | GTGCAAAAGTCTAGCCCCGAT                                    |
| <i>Myc</i>                              | CCAGGACTGTATGGGCGG                                                                                | TCAGGCTGGTGTCTTTTG                                       |
| <i>Cyr61</i>                            | GCAAGTAGAGGTGGGAACC                                                                               | GTCCCAGGAATTCCTCCCTCG                                    |
| <i>Ctgf</i>                             | GGTCACTCCCCATGGTCTC                                                                               | GTAGAATGGGTCTGTAGCCCT                                    |
| <i>Tead1</i>                            | TGGAAGGGAACTCCTAGCC                                                                               | CAGGCCTCACCACCGTATTTC                                    |
| <i>Tead4</i>                            | TTTTCTTACGCGTCTCCCGG                                                                              | CTCGGGCCAGCAGTAAATCT                                     |
| <b>Bisulfite sequencing</b>             | <b>Primer-1</b>                                                                                   | <b>Primer-2</b>                                          |
| <i>Myc</i>                              | GGGTTTTTTTTTATTTATGTG                                                                             | AAACCCACTAAAATCAATACACTC                                 |
| <i>Tead1</i>                            | ATTTTGTTTTTTGGAAATGTTGT                                                                           | CTACCAACACCTACTCTCTTCAT                                  |
| <i>Tead4</i>                            | TATGTGAATGGGATGATAGGT                                                                             | CTCCCAACCAAACTAATAAACAA                                  |
| <i>Cyr61</i>                            | GTGAA TTGTAGGAAGTGGTTG                                                                            | CAACCCTAACCCCTTAAACAATAA                                 |
| <i>Ctgf</i>                             | TGTAAGTAGTTTTGTGATTTTTGTT                                                                         | ACTACAACCTTATATCTTTAATAAATCC                             |
| <i>Almot12</i>                          | TGGTTTTGTGTTTTTAGGTTAT                                                                            | TCAAAATATTCACAAAACACTACTAC                               |
| <i>Kibra</i>                            | GTTTTTGTGTTGAGGTTGATTA                                                                            | AAATCTACAATTTCAACCTACTTCTCTCT                            |
| <i>Sic1a5</i>                           | TGAGATAGGTAGATTAGTTGAGTT                                                                          | TTTTATCCATCCCTATAACCAAAAA                                |
| <b>Clone rDMR for enhancer assay</b>    | <b>Primer-1</b>                                                                                   | <b>Primer-2</b>                                          |
| <i>Myc</i>                              | GGTACCGAGCTCTACGCGTGGTTTTCCGCCAACCAACCAG                                                          | TGCAGATCGCAGATCTCGAGTGAGGGGTCAATGCACCTC                  |
| <i>Cyr61</i>                            | GGTACCGAGCTCTACGCGTACGACTACTCTAGGTGCC                                                             | TGCAGATCGCAGATCTCGAGCCCTTGAATTCCTCACTG                   |
| <i>Ctgf</i>                             | GGTACCGAGCTCTACGCGTAGCAGCATCCATGAGGAAAC                                                           | TGCAGATCGCAGATCTCGAGGACTGACGGGCTGATGGAAATTTTAAAAAATAATTG |
| <b>TEAD motif deletion</b>              | <b>Primer-1</b>                                                                                   | <b>Primer-2</b>                                          |
| <i>Myc</i>                              | CCGTACAGCCCTCTGCGACGAGGAAGAGAAATTTTC                                                              | TCGTCCGAGAGGGCTGTACGGAGTCTGTAGTCTC                       |
| <i>Cyr61</i>                            | TTACAAGGATAAAGCCTAAGAGTTACCCC                                                                     | CTTAGGCTTTATCCTTTGAAAAATAAATCATTTG                       |
| <i>Ctgf</i>                             | GAATTCACACTCTTACACCTTAACCTTTG                                                                     | AGGTGTAAGAAGTGTGAAATCTCTCAGATTG                          |
| <b>Clone rDMR for pCpGfree-promoter</b> | <b>Primer-1</b>                                                                                   | <b>Primer-2</b>                                          |
| <i>Myc</i>                              | CCTAGGATGCATAGTACTAGACACTTGTCTCCCTTGTCTGT                                                         | TCTCCACTAGTTACATGTTGCCTACCCTGCTGTGAATGGG                 |
| <i>Cyr61</i>                            | CCTAGGATGCATAGTACTAGCAGGCAATCAGGAACAACCTG                                                         | TCTCCACTAGTTACATGTTGGTGCAGCTGCTCTACCTCTC                 |
| <b>Tef1 shRNA</b>                       | <b>Primer</b>                                                                                     |                                                          |
| sh Tef1 -a                              | TGCTGTTGACAGTAGCGCCAGGTTCAACAATGTTGCTCTATAGTGAAGCCACAGATGTA TAGAGCAACATTTGGAACCTGTGCCTACTGCCTCGGA |                                                          |
| sh Tef1 -b                              | TGC TGTGACAGTACGCGACAGGTAATAAGAGACTGTTATAGTGAAGCCACAGATGTA TAACAGCTCTTTAGTACCTGGTGCCTACTGCCTCGGA  |                                                          |
